# Supplementary material for: Deriving time-concordant event cascades from gene expression data: A case study for Drug-Induced Liver Injury (DILI)
Source: PubMed Central journal article supplement (PMC9292124; doi:10.1371/journal.pcbi.1010148), 2022-06-10

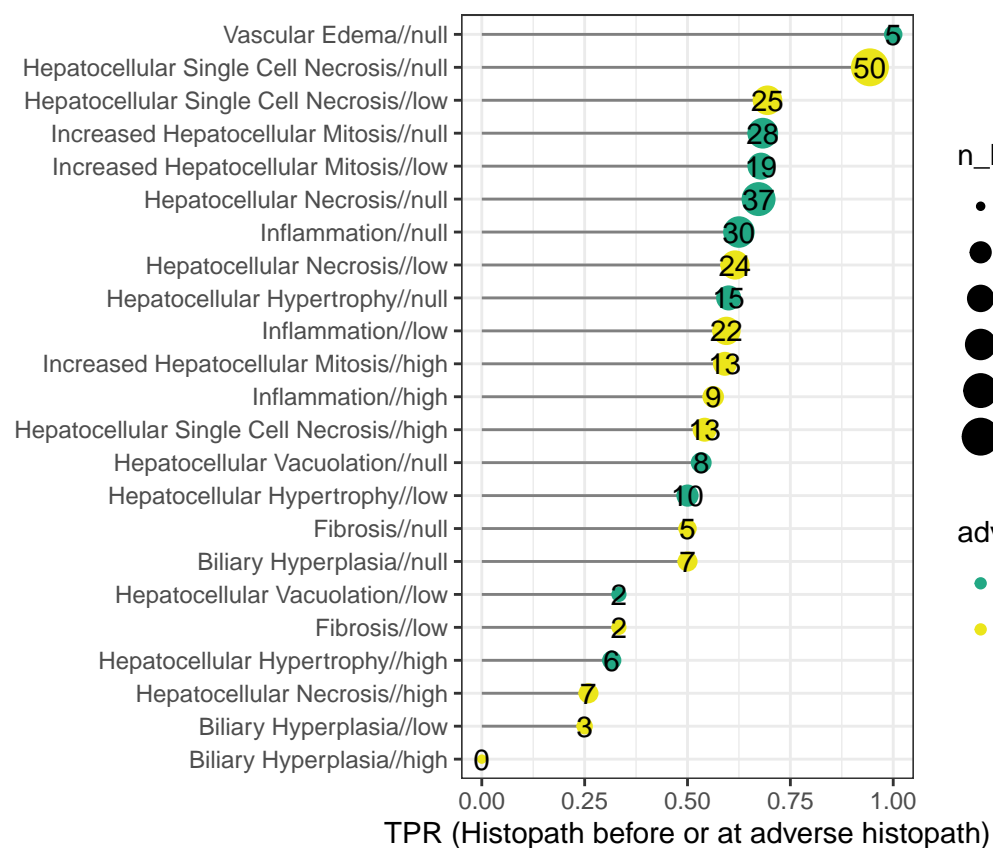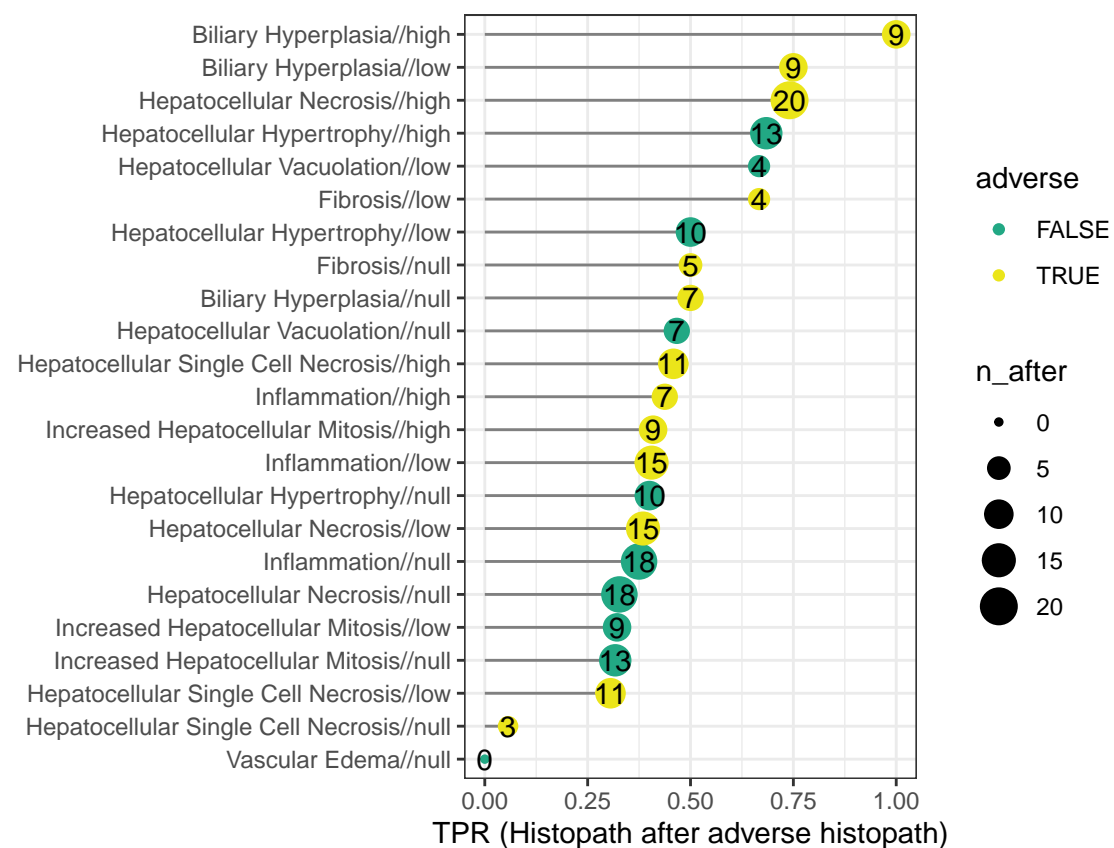

Supplement: pcbi.1010148.s008.pdf [file pcbi.1010148.s008.pdf]
